# Supplementary material for: Highly stable heterostructured Ag–AgBr/TiO2 composite: a bifunctional visible-light active photocatalyst for destruction of ibuprofen and bacteria
Source: Royal Society of Chemistry journal article supplement (doi:10.1039/c2jm35503e), 2012-01-01
Supplement: c2jm35503e.pdf [file c2jm35503e.pdf]

## Supplementary information

### Highly stable heterostructured Ag-AgBr/TiO<sub>2</sub> composite: A bifunctional visible-light active photocatalyst for destruction of ibuprofen and bacteria

Xiaoping Wang <sup>a</sup>, Yuxin Tang <sup>b</sup>, Zhong Chen <sup>b</sup>, Teik-Thye Lim <sup>a,\*</sup>

<sup>a</sup> Division of Environmental and Water Resources Engineering, School of Civil and Environmental Engineering, Nanyang Technological University, Block N1, 50 Nanyang Avenue, Singapore 639798, Singapore

<sup>b</sup> School of Materials Science and Engineering, Nanyang Technological University, Block N4.1, 50 Nanyang Avenue, Singapore 639798, Singapore

\* Corresponding authors: Tel: +65-6790-6933; Fax: +65 67910676; Email: cttlim@ntu.edu.sg

Fig. S1. TEM image of Ag-AgBr/TiO<sub>2</sub>, and the corresponding EDX spectra for the designated spots.

Fig. S2. TEM image of S-Ag-AgBr/TiO<sub>2</sub>, the corresponding HRTEM images and EDX spectra for the designated spots.

Fig. S3. FESEM images of Ag-AgBr (A), TiO<sub>2</sub> (B) and Ag-TiO<sub>2</sub> (C).

Fig. S4. Time-dependent UV-vis absorption spectra and HPLC profiles of IBP in the course of photocatalytic degradation under white LED irradiation.

Fig. S5. Compare the XRD patterns of fresh and used Ag-AgBr/TiO<sub>2</sub> composites.

Fig. S6. Compare the high resolution XPS spectra of fresh and used Ag-AgBr/TiO<sub>2</sub> composites.

Fig. S7. Proposed photocatalytic mechanisms over the Ag/TiO<sub>2</sub> (A) and Ag-AgBr (B) under white LED irradiation.

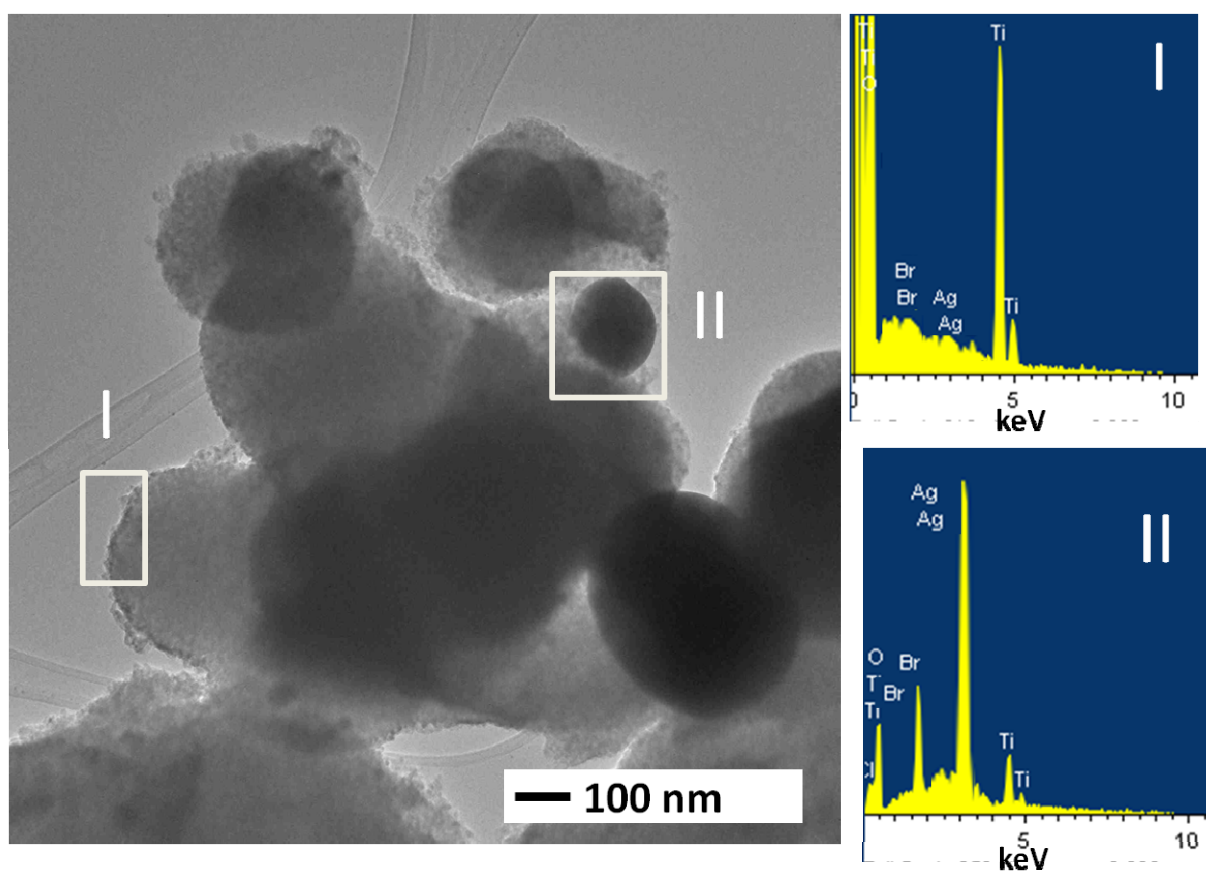

**Fig. S1.** TEM image of Ag-AgBr/TiO<sub>2</sub>, and the corresponding EDX spectra for the designated spots.

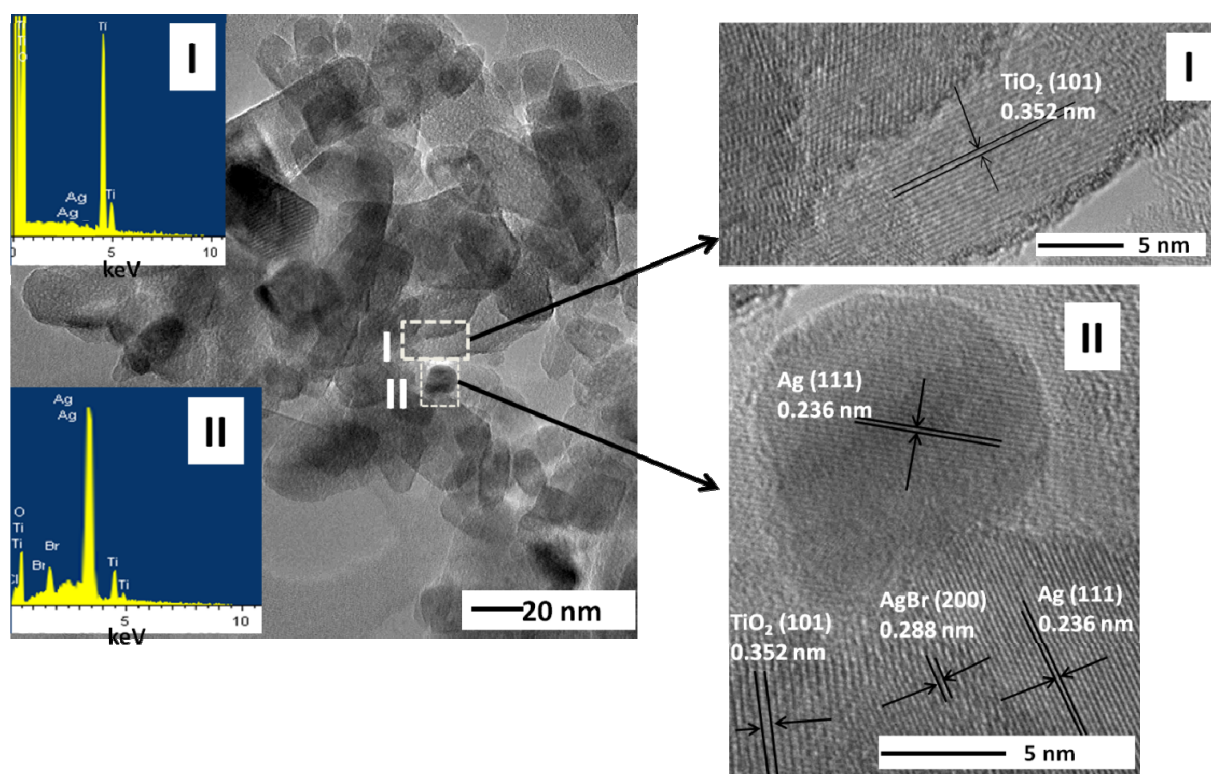

**Fig. S2.** TEM image of S-Ag-AgBr/TiO<sub>2</sub>, the corresponding HRTEM images and EDX spectra for the designated spots.

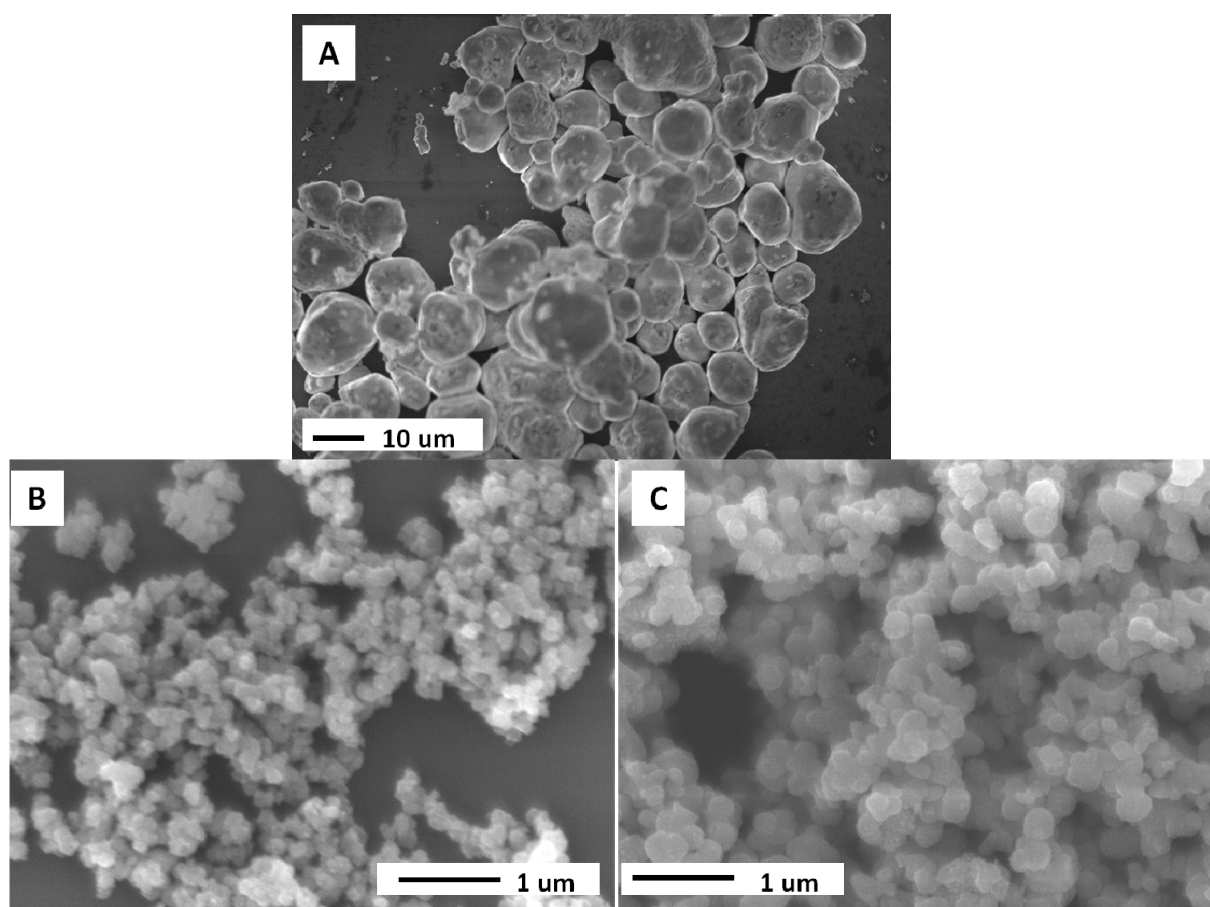

**Fig. S3.** FESEM images of Ag-AgBr (A), TiO<sub>2</sub> (B) and Ag-TiO<sub>2</sub> (C).

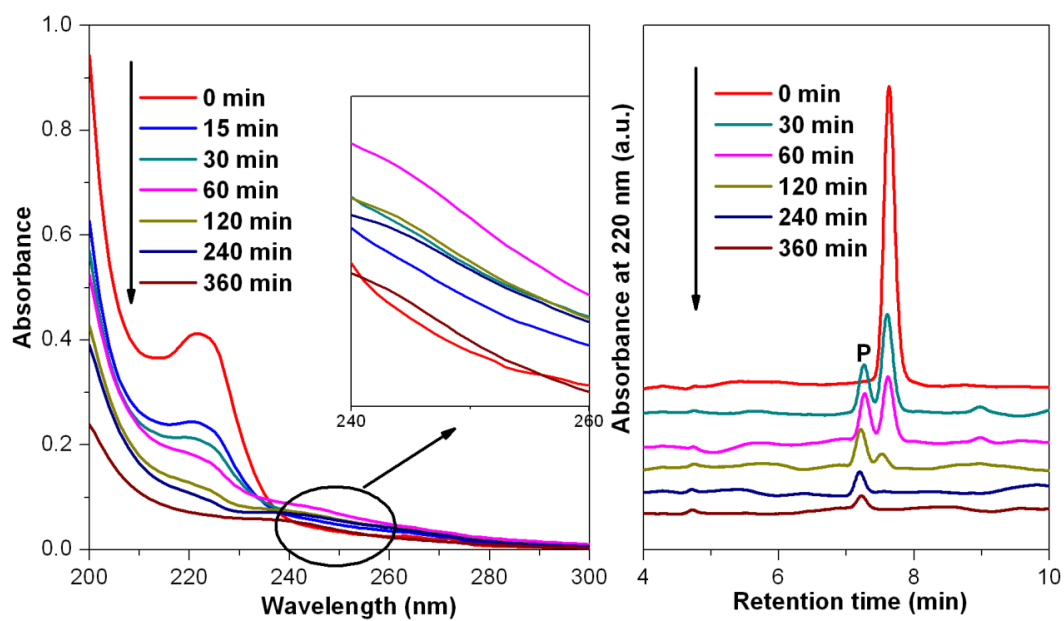

**Fig. S4.** Time-dependent UV-vis absorption spectra and HPLC profiles of IBP in the course of photocatalytic degradation under white LED irradiation.

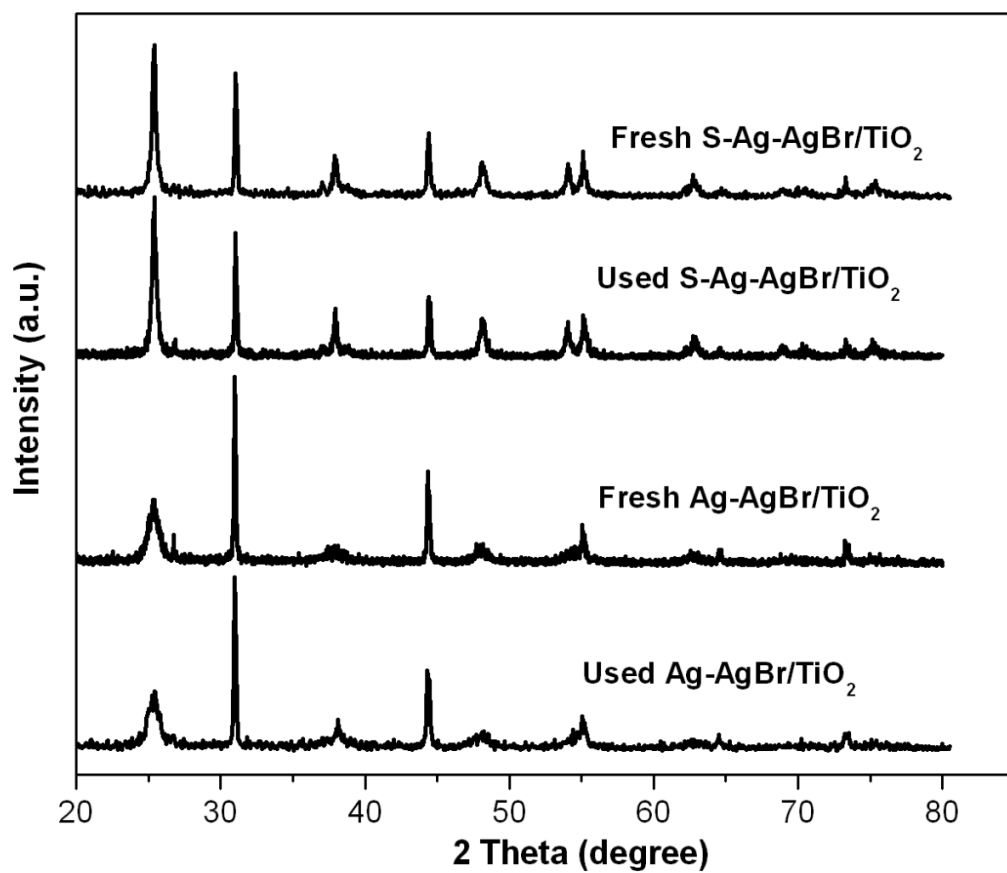

Fig. S5. Compare the XRD patterns of fresh and used Ag-AgBr/TiO<sub>2</sub> composites.

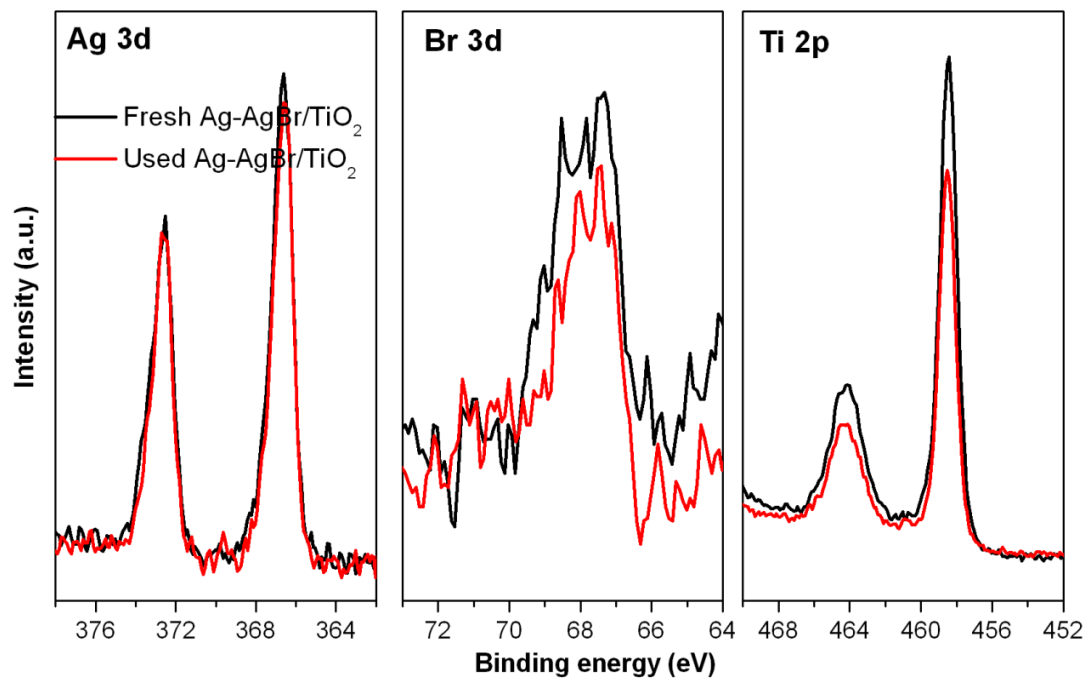

**Fig. S6.** Compare the high resolution XPS spectra of fresh and used Ag-AgBr/TiO<sub>2</sub> composites.

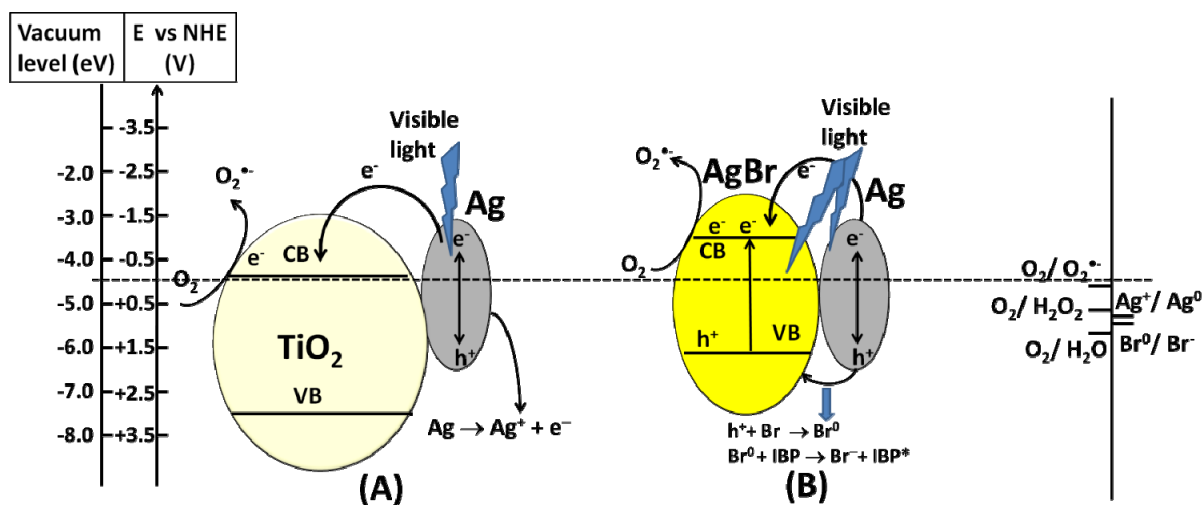

**Fig. S7.** Proposed photocatalytic mechanisms over the Ag/TiO<sub>2</sub> (A) and Ag-AgBr (B) under white LED irradiation.

For the visible-light irradiated Ag/TiO<sub>2</sub> and Ag-AgBr, the plasmon-induced electrons on the surface of Ag nanoparticles could migrate to the conduction band (CB) of TiO<sub>2</sub> and AgBr respectively. The migration of plasmon-induced electrons from Ag nanoparticles in the Ag/TiO<sub>2</sub> could result in the oxidation of metallic Ag and formation of soluble Ag<sup>+</sup>. Then electrons in the CB of TiO<sub>2</sub> could be trapped by O<sub>2</sub> to generate O<sub>2</sub><sup>•-</sup> and other oxidative species, which subsequently could be consumed for oxidation of IBP. Hence, the process of IBP degradation might facilitate the continual electron transfer from Ag nanoparticles to TiO<sub>2</sub> to some extent. It has been reported that the plasmon-induced hole on Ag nanoparticles as a reactive species were able to oxidize organic pollutants such as RhB and 2-chlorophenol, etc., consequently Ag nanoparticles were promptly regenerated by accepting the electrons from these organic pollutants. As mentioned above, certain amount of Ag<sup>+</sup> ions was released from the Ag/TiO<sub>2</sub> and Ag-AgBr in the IBP solutions. It infers that Ag<sup>+</sup> might not be capable of oxidizing IBP (and regenerate Ag<sup>0</sup>) due to its relatively low oxidizing potential of E<sup>0</sup>(Ag<sup>+</sup>/Ag<sup>0</sup>) (+0.799 V vs NHE), or Ag<sup>+</sup> might not be completely reduced by the IBP. As a result, the corrosion of Ag nanoparticles occurred. For Ag-AgBr, the plasmon-induced holes would migrate away from the Ag and be trapped within the surface of AgBr particles, leading to the efficient charge separation in the Ag nanoparticles. Similarly, the electrons in the CB of AgBr could be subsequently transferred to the surface-absorbed O<sub>2</sub> to form various oxidative species. Therefore, the Ag-AgBr was stable under the experimental conditions.
